# Supplementary material
Source: ML conference proceedings conference paper supplement (https://openaccess.thecvf.com/content/ICCV2023/html/Bokhovkin_Mesh2Tex_Generating_Mesh_ICCV_2023_paper.html)
Supplement: Supplementary file 2 [file Bokhovkin_Mesh2Tex_Generating_Mesh_ICCV_2023_supplemental.zip]

Archive with 2 entries (2 files):
- 06146_supp.mp4
- 06146_supp.pdf
